# Supplementary material for: Young migrants’ sexual rights in Sweden: a cross-sectional study
Source: PubMed Central journal article supplement (PMC8420038; doi:10.1186/s12889-021-11672-1), 2021-09-06
Supplement: 12889_2021_11672_MOESM2_ESM.pdf [file 12889_2021_11672_MOESM2_ESM.pdf]

To what extent are young migrants' sexual rights being fulfilled in Sweden? A cross-sectional study.  
 Baroudi, M. Hurtig, A-K. Goicolea, I. San Sebastian, M. Jonzon, R. Nkulu-Kalengayi, F

Additional file 2: Detailed results of all questions in the five domains of sexual rights.

| <b>Table1: The right to the highest attainable sexual health</b> |               |             |                    |                    |              |                    |                       |                     |                    |              |            |             |               |               |
|------------------------------------------------------------------|---------------|-------------|--------------------|--------------------|--------------|--------------------|-----------------------|---------------------|--------------------|--------------|------------|-------------|---------------|---------------|
|                                                                  | Women<br>n(%) | Men<br>n(%) | non-binary<br>n(%) | Heterosexu<br>n(%) | LGBA<br>n(%) | Don't want<br>n(%) | Still waiting<br>n(%) | 2016 or lat<br>n(%) | before 201<br>n(%) | MENA<br>n(%) | SA<br>n(%) | SSA<br>n(%) | Other<br>n(%) | Total<br>n(%) |
| <b>Self-rated sexual health</b>                                  |               |             |                    |                    |              |                    |                       |                     |                    |              |            |             |               |               |
| good/fair                                                        | 399(72,7)     | 788(79,1)   | 22(66,7)           | 886(80)            | 143(73,7)    | 129(62)            | 107(64,1)             | 685(78,8)           | 387(77,9)          | 729(76,6)    | 188(66)    | 283(84,7)   | 33(71,7)      | 1230(76,3)    |
| poor                                                             | 19(3,5)       | 77(7,7)     | 4(12,1)            | 59(5,3)            | 21(10,8)     | 13(6,3)            | 30(18)                | 42(4,8)             | 21(4,2)            | 40(4,2)      | 45(15,8)   | 16(4,8)     | 0(0)          | 101(6,3)      |
| don't know                                                       | 131(23,9)     | 131(13,2)   | 7(21,2)            | 162(14,6)          | 30(15,5)     | 66(31,7)           | 30(18)                | 142(16,3)           | 89(17,9)           | 183(19,2)    | 52(18,3)   | 35(10,5)    | 13(28,3)      | 283(17,5)     |

**Table2: The right to access sexual and reproductive health services**

|                                    | Women<br>n(%) | Men<br>n(%) | non-binar<br>n(%) | Heterosexu<br>n(%) | LGBA<br>n(%) | Don't want<br>n(%) | Still waiting<br>n(%) | 2016 or lat<br>n(%) | before 201<br>n(%) | MENA<br>n(%) | SA<br>n(%) | SSA<br>n(%) | Other<br>n(%) | Total<br>n(%) |
|------------------------------------|---------------|-------------|-------------------|--------------------|--------------|--------------------|-----------------------|---------------------|--------------------|--------------|------------|-------------|---------------|---------------|
| <b>Visited SRH services</b>        |               |             |                   |                    |              |                    |                       |                     |                    |              |            |             |               |               |
| no                                 | 423(75,5)     | 849(84,4)   | 24(80)            | 911(83)            | 145(74)      | 174(82,9)          | 138(78)               | 691(80,2)           | 424(83,6)          | 794(83,6)    | 227(78,3)  | 274(79)     | 38(79,2)      | 1330(81,5)    |
| yes                                | 124(22,1)     | 101(10)     | 4(13,3)           | 152(13,8)          | 40(20,4)     | 20(9,5)            | 22(12,4)              | 132(15,3)           | 68(13,4)           | 134(14,1)    | 39(13,5)   | 48(13,8)    | 7(14,6)       | 228(13,9)     |
| don't know                         | 13(2,3)       | 56(5,6)     | 2(6,7)            | 35(3,2)            | 11(5,6)      | 16(7,6)            | 17(9,6)               | 39(4,5)             | 15(3)              | 22(2,3)      | 24(8,3)    | 25(7,2)     | 3(6,3)        | 74(4,5)       |
| <b>Treated with respect</b>        |               |             |                   |                    |              |                    |                       |                     |                    |              |            |             |               |               |
| agree                              | 108(93,1)     | 100(90,9)   | 5(83,3)           | 140(95,2)          | 39(90,7)     | 21(77,8)           | 23(79,3)              | 61(93,9)            | 127(94,1)          | 135(95,7)    | 37(90,2)   | 34(85)      | 8(88,9)       | 214(92,6)     |
| disagree                           | 8(6,9)        | 10(9,1)     | 1(16,7)           | 7(4,8)             | 4(9,3)       | 6(22,2)            | 6(20,7)               | 4(6,2)              | 8(5,9)             | 6(4,3)       | 4(9,8)     | 6(15)       | 1(11,1)       | 17(7,4)       |
| <b>Privacy ensured</b>             |               |             |                   |                    |              |                    |                       |                     |                    |              |            |             |               |               |
| agree                              | 98(90,7)      | 76(85,4)    | 2(50)             | 120(89,6)          | 26(81,3)     | 19(86,4)           | 14(66,7)              | 52(88,1)            | 109(92,4)          | 116(94,3)    | 22(73,3)   | 29(78,4)    | 7(87,5)       | 174(87,9)     |
| disagree                           | 10(9,3)       | 13(14,6)    | 2(50)             | 14(10,5)           | 6(18,8)      | 3(13,6)            | 7(33,3)               | 7(11,9)             | 9(7,6)             | 7(5,7)       | 8(26,7)    | 8(21,6)     | 1(12,5)       | 24(12,1)      |
| <b>No-judgement from staff</b>     |               |             |                   |                    |              |                    |                       |                     |                    |              |            |             |               |               |
| agree                              | 76(75,3)      | 49(67,1)    | 2(40)             | 88(74,6)           | 17(63)       | 13(59,1)           | 8(40)                 | 36(66,7)            | 82(78,9)           | 92(83,6)     | 13(48,2)   | 14(45,2)    | 7(87,5)       | 126(71,6)     |
| disagree                           | 25(24,8)      | 24(32,9)    | 3(60)             | 30(25,4)           | 10(37)       | 9(40,9)            | 12(60)                | 18(33,3)            | 22(21,2)           | 18(16,4)     | 14(51,9)   | 17(54,8)    | 1(12,5)       | 50(28,4)      |
| <b>Received expected help</b>      |               |             |                   |                    |              |                    |                       |                     |                    |              |            |             |               |               |
| agree                              | 87(79,8)      | 58(69,9)    | 1(20)             | 101(75,9)          | 22(81,5)     | 13(56,5)           | 11(55)                | 47(75,8)            | 86(77,5)           | 94(76,4)     | 19(70,4)   | 24(72,7)    | 7(87,5)       | 144(75,4)     |
| disagree                           | 22(20,2)      | 25(30,1)    | 4(80)             | 32(24,1)           | 5(18,5)      | 10(43,5)           | 9(45)                 | 15(24,2)            | 25(22,5)           | 29(23,6)     | 8(29,6)    | 9(27,3)     | 1(12,5)       | 47(24,6)      |
| <b>No discrimination</b>           |               |             |                   |                    |              |                    |                       |                     |                    |              |            |             |               |               |
| agree                              | 102(90,3)     | 73(86,9)    | 3(60)             | 120(88,9)          | 26(89,7)     | 19(82,6)           | 13(72,2)              | 54(87,1)            | 105(90,5)          | 114(92,7)    | 26(86,7)   | 33(82,5)    | 7(87,5)       | 180(89,6)     |
| disagree                           | 11(9,7)       | 11(13,1)    | 2(40)             | 15(11,1)           | 3(10,3)      | 4(17,4)            | 5(27,8)               | 8(12,9)             | 11(9,5)            | 9(7,3)       | 4(13,3)    | 7(17,5)     | 1(12,5)       | 21(10,5)      |
| <b>Satisfied with the services</b> |               |             |                   |                    |              |                    |                       |                     |                    |              |            |             |               |               |
| satisfied/ok                       | 122(91,7)     | 114(86,4)   | 6(100)            | 155(89,6)          | 43(89,6)     | 26(86,7)           | 25(80,7)              | 73(93,6)            | 140(89,2)          | 137(89,5)    | 46(83,6)   | 51(91,1)    | 9(100)        | 243(89)       |
| dissatisfied                       | 11(8,3)       | 18(13,6)    | 0(0)              | 18(10,4)           | 5(10,4)      | 4(13,3)            | 6(19,4)               | 5(6,4)              | 17(10,8)           | 16(10,5)     | 9(16,4)    | 5(8,9)      | 0(0)          | 30(11)        |
| <b>Refrained from SRH services</b> |               |             |                   |                    |              |                    |                       |                     |                    |              |            |             |               |               |
| No                                 | 478(87,6)     | 790(80,9)   | 21(65,6)          | 899(83,4)          | 148(75,5)    | 172(84,3)          | 119(70)               | 714(84,7)           | 423(84,8)          | 788(83,7)    | 213(77,5)  | 276(82,4)   | 43(93,5)      | 1320(82,6)    |
| Yes                                | 68(12,5)      | 186(19,1)   | 11(34,4)          | 179(16,6)          | 48(24,5)     | 32(15,7)           | 51(30)                | 129(15,3)           | 76(15,2)           | 154(16,4)    | 62(22,6)   | 59(17,6)    | 3(6,5)        | 278(17,4)     |

**Table3: The right to access information and education about SRHR**

|                                         | Women<br>n(%) | Men<br>n(%) | non-binary<br>n(%) | Heterosexu<br>n(%) | LGBA<br>n(%) | Don't want<br>n(%) | Still waiting<br>n(%) | 2016 or lat<br>n(%) | before 201<br>n(%) | MENA<br>n(%) | SA<br>n(%) | SSA<br>n(%) | Other<br>n(%) | Total<br>n(%) |
|-----------------------------------------|---------------|-------------|--------------------|--------------------|--------------|--------------------|-----------------------|---------------------|--------------------|--------------|------------|-------------|---------------|---------------|
| <b>Know where to get more knowledge</b> |               |             |                    |                    |              |                    |                       |                     |                    |              |            |             |               |               |
| yes                                     | 376(70,9)     | 561(60,1)   | 13(40,6)           | 690(65,7)          | 105(56,2)    | 106(56,4)          | 73(45,9)              | 499(62,1)           | 347(71,6)          | 597(64,9)    | 128(50,4)  | 199(62,4)   | 33(82,5)      | 957(62,4)     |
| no                                      | 154(29,1)     | 372(39,9)   | 19(59,4)           | 360(34,3)          | 82(43,9)     | 82(43,6)           | 86(54,1)              | 304(37,9)           | 138(28,5)          | 323(35,1)    | 126(49,6)  | 120(37,6)   | 7(17,5)       | 576(37,6)     |
| <b>Know where to get contraceptives</b> |               |             |                    |                    |              |                    |                       |                     |                    |              |            |             |               |               |
| yes                                     | 329(60,8)     | 461(49,4)   | 11(36,7)           | 614(57,7)          | 98(53)       | 67(34,5)           | 76(49,7)              | 422(51,5)           | 275(56,6)          | 463(49,9)    | 148(57,4)  | 182(58)     | 30(73,2)      | 823(53,4)     |
| no                                      | 101(18,7)     | 207(22,2)   | 12(40)             | 199(18,7)          | 44(23,8)     | 60(30,9)           | 52(34)                | 161(19,7)           | 89(18,3)           | 152(16,4)    | 79(30,6)   | 95(30,3)    | 4(9,8)        | 330(21,4)     |
| not applicable                          | 111(20,5)     | 265(28,4)   | 7(23,3)            | 252(23,7)          | 43(23,2)     | 67(34,5)           | 25(16,3)              | 236(28,8)           | 122(25,1)          | 313(33,7)    | 31(12)     | 37(11,8)    | 7(17,1)       | 388(25,2)     |

**Table4: The right to be free from coercion and violence**

|                                           | Women<br>n(%) | Men<br>n(%) | non-binary<br>n(%) | Heterosexu<br>n(%) | LGBA<br>n(%) | Don't want<br>n(%) | Still waiting<br>n(%) | 2016 or lat<br>n(%) | before 201<br>n(%) | MENA<br>n(%) | SA<br>n(%) | SSA<br>n(%) | Other<br>n(%) | Total<br>n(%) |
|-------------------------------------------|---------------|-------------|--------------------|--------------------|--------------|--------------------|-----------------------|---------------------|--------------------|--------------|------------|-------------|---------------|---------------|
| <b>Ever experienced sexual harassment</b> |               |             |                    |                    |              |                    |                       |                     |                    |              |            |             |               |               |
| no                                        | 391(72,8)     | 594(62,8)   | 11(37,9)           | 708(66,5)          | 99(53,5)     | 134(67)            | 62(38)                | 343(69,9)           | 572(70)            | 669(70,9)    | 122(46,2)  | 202(64,7)   | 23(59)        | 1016(65,2)    |
| yes                                       | 111(20,7)     | 248(26,2)   | 13(44,8)           | 258(24,3)          | 68(36,8)     | 39(19,5)           | 65(39,9)              | 105(21,4)           | 188(23)            | 209(22,2)    | 94(35,6)   | 77(24,7)    | 12(30,8)      | 392(25,2)     |
| Don't know/not                            | 35(6,5)       | 104(11)     | 5(17,2)            | 98(9,2)            | 18(9,7)      | 27(13,5)           | 36(22,1)              | 43(8,8)             | 57(7)              | 65(6,9)      | 48(18,2)   | 33(10,6)    | 4(10,3)       | 150(9,6)      |
| <b>which type of harrassment</b>          |               |             |                    |                    |              |                    |                       |                     |                    |              |            |             |               |               |
| sexual remarks                            | 74(14,2)      | 74(8,5)     | 7(25,9)            | 102(10,1)          | 38(23,5)     | 15(7,9)            | 31(21,5)              | 80(10,4)            | 41(8,7)            | 96(10,6)     | 39(16,4)   | 26(9,6)     | 4(10,3)       | 165(11,3)     |
| exposing body                             | 34(6,9)       | 100(12,5)   | 7(29,2)            | 93(9,9)            | 30(22,1)     | 16(9,1)            | 25(21,9)              | 80(10,8)            | 38(8,7)            | 93(10,6)     | 30(15,4)   | 23(9,8)     | 3(7,9)        | 149(11,1)     |
| touch                                     | 42(8,6)       | 73(9,2)     | 5(21,7)            | 75(8)              | 30(22,4)     | 16(9,4)            | 17(15)                | 66(9)               | 38(8,9)            | 79(9,1)      | 24(12,8)   | 29(12,2)    | 2(5,4)        | 134(10)       |
| masturbate                                | 11(2,3)       | 27(3,5)     | 4(18,2)            | 26(2,8)            | 7(5,3)       | 9(5,3)             | 14(12,7)              | 20(2,8)             | 9(2,1)             | 22(2,6)      | 14(7,5)    | 6(2,6)      | 2(5,3)        | 44(3,4)       |
| vaginal sex                               | 22(4,5)       | 57(7,3)     | 2(9,1)             | 61(6,6)            | 12(8,8)      | 8(4,7)             | 15(13,6)              | 35(4,8)             | 28(6,5)            | 25(2,9)      | 17(9,1)    | 37(16)      | 6(16,2)       | 85(6,5)       |
| oral sex                                  | 16(3,3)       | 52(6,5)     | 5(22,7)            | 46(4,9)            | 13(9,6)      | 12(6,9)            | 13(11,4)              | 38(5,2)             | 16(3,7)            | 33(3,8)      | 21(10,9)   | 15(6,3)     | 3(7,9)        | 72(5,4)       |
| anani sex                                 | 13(2,7)       | 26(3,3)     | 5(25)              | 21(2,3)            | 15(11)       | 7(4,2)             | 11(10)                | 17(2,3)             | 13(3)              | 22(2,5)      | 13(7,1)    | 6(2,6)      | 3(8,3)        | 44(3,4)       |
| through internet                          | 35(7,2)       | 61(7,8)     | 8(34,8)            | 71(7,6)            | 21(15,6)     | 10(5,9)            | 16(14,3)              | 52(7,1)             | 27(6,3)            | 73(8,4)      | 19(10,3)   | 15(6,4)     | 3(8,3)        | 110(8,3)      |
| nude photos                               | 4(0,8)        | 15(1,9)     | 2(8,7)             | 13(1,4)            | 3(2,3)       | 4(2,4)             | 5(4,6)                | 9(1,3)              | 7(1,7)             | 15(1,7)      | 2(1,1)     | 3(1,3)      | 2(5,6)        | 22(1,7)       |
| other                                     | 10(2,3)       | 19(2,7)     | 1(5,6)             | 19(2,3)            | 5(4,3)       | 4(2,5)             | 7(6,9)                | 11(1,7)             | 9(2,3)             | 22(2,8)      | 6(3,8)     | 5(2,2)      | 0(0)          | 33(2,8)       |
| <b>who was the perpetrator</b>            |               |             |                    |                    |              |                    |                       |                     |                    |              |            |             |               |               |
| partner                                   | 28(31,1)      | 42(22,5)    | 2(18,2)            | 47(24,5)           | 19(29,2)     | 7(25,9)            | 13(22)                | 29(21,2)            | 25(30,1)           | 32(21,1)     | 16(20)     | 24(37,5)    | 3(37,5)       | 75(24,7)      |
| family/friend                             | 14(15,6)      | 30(16)      | 2(18,2)            | 25(13)             | 12(18,5)     | 6(22,2)            | 10(17)                | 19(13,9)            | 12(14,5)           | 25(16,5)     | 12(15)     | 10(15,6)    | 1(12,5)       | 48(15,8)      |
| teacher/boss                              | 4(4,4)        | 6(3,2)      | 0(0)               | 7(3,7)             | 1(1,5)       | 1(3,7)             | 2(3,4)                | 2(1,5)              | 5(6)               | 7(4,6)       | 2(2,5)     | 0(0)        | 1(12,5)       | 10(3,3)       |
| colleague                                 | 9(10)         | 35(18,7)    | 3(27,3)            | 31(16,2)           | 9(13,9)      | 5(18,5)            | 8(13,6)               | 24(17,5)            | 12(14,5)           | 22(14,5)     | 11(13,8)   | 12(18,8)    | 0(0)          | 45(14,8)      |
| stranger                                  | 48(53,3)      | 82(43,9)    | 5(45,5)            | 95(49,5)           | 28(43,1)     | 11(40,7)           | 27(45,8)              | 73(53,3)            | 34(41)             | 76(50)       | 45(56,3)   | 18(28,1)    | 3(37,5)       | 142(46,7)     |
| other                                     | 4(4,4)        | 13(7)       | 2(18,2)            | 12(6,3)            | 7(10,8)      | 2(7,4)             | 6(10,2)               | 6(4,4)              | 9(10,8)            | 13(8,6)      | 6(7,5)     | 4(6,3)      | 1(12,5)       | 24(7,9)       |
| <b>Did you talk/report about it</b>       |               |             |                    |                    |              |                    |                       |                     |                    |              |            |             |               |               |
| yes friend/relati                         | 34(37,8)      | 56(27,5)    | 2(16,7)            | 65(31,9)           | 17(25,8)     | 6(18,8)            | 12(19,4)              | 49(33,3)            | 29(34,5)           | 50(30,9)     | 20(23,3)   | 19(30,2)    | 4(40)         | 93(29)        |
| yes teacher/cou                           | 3(3,3)        | 10(4,9)     | 0(0)               | 7(3,4)             | 5(7,6)       | 1(3,1)             | 4(6,5)                | 6(4,1)              | 3(3,6)             | 7(4,3)       | 7(8,1)     | 0(0)        | 0(0)          | 14(4,4)       |
| yes boss/employ                           | 1(1,1)        | 2(1)        | 0(0)               | 2(1)               | 1(1,5)       | 0(0)               | 1(1,6)                | 2(1,4)              | 0(0)               | 1(0,6)       | 1(1,2)     | 1(1,6)      | 0(0)          | 3(0,9)        |
| yes social servic                         | 2(2,2)        | 4(2)        | 0(0)               | 4(2)               | 2(3)         | 0(0)               | 1(1,6)                | 1(0,7)              | 3(3,6)             | 2(1,2)       | 2(2,3)     | 2(3,2)      | 0(0)          | 6(1,9)        |
| yes police                                | 3(3,3)        | 3(1,5)      | 0(0)               | 4(2)               | 1(1,5)       | 0(0)               | 0(0)                  | 3(2)                | 2(2,4)             | 3(1,9)       | 3(3,5)     | 0(0)        | 0(0)          | 6(1,9)        |
| no                                        | 51(56,7)      | 132(64,7)   | 9(75)              | 127(62,3)          | 42(63,6)     | 23(71,9)           | 43(69,4)              | 88(59,9)            | 51(60,7)           | 103(63,6)    | 55(64)     | 40(63,5)    | 6(60)         | 204(63,6)     |
| other                                     | 5(5,6)        | 7(3,4)      | 1(8,3)             | 8(3,9)             | 3(4,6)       | 2(6,3)             | 3(4,8)                | 6(4,1)              | 5(6)               | 9(5,6)       | 4(4,7)     | 2(3,2)      | 0(0)          | 15(4,7)       |

**Table5: The right to make free informed decision about sexuality and sexual relations**

|                                                           | Women<br>n(%) | Men<br>n(%) | non-binary<br>n(%) | Heterosexu<br>n(%) | LGBA<br>n(%) | Don't want<br>n(%) | Still waiting<br>n(%) | 2016 or lat<br>n(%) | before 201<br>n(%) | MENA<br>n(%) | SA<br>n(%) | SSA<br>n(%) | Other<br>n(%) | Total<br>n(%) |
|-----------------------------------------------------------|---------------|-------------|--------------------|--------------------|--------------|--------------------|-----------------------|---------------------|--------------------|--------------|------------|-------------|---------------|---------------|
| <b>Limited in whom to have an intimated relation with</b> |               |             |                    |                    |              |                    |                       |                     |                    |              |            |             |               |               |
| no                                                        | 272(50,8)     | 475(48,3)   | 8(23,5)            | 554(50,7)          | 67(35,6)     | 92(43,2)           | 59(34,9)              | 406(48,1)           | 266(53,6)          | 457(48,6)    | 112(39,7)  | 161(48,2)   | 27(62,8)      | 757(47,3)     |
| I limit myself                                            | 125(23,3)     | 206(20,9)   | 10(29,4)           | 253(23,2)          | 48(25,5)     | 38(17,8)           | 35(20,7)              | 192(22,7)           | 106(21,4)          | 202(21,5)    | 51(18,1)   | 103(30,8)   | 7(16,3)       | 363(22,7)     |
| yes family                                                | 58(10,8)      | 89(9)       | 4(11,8)            | 104(9,5)           | 31(16,5)     | 9(4,2)             | 17(10,1)              | 80(9,5)             | 53(10,7)           | 94(10)       | 31(11)     | 27(8,1)     | 4(9,3)        | 156(9,8)      |
| yes country fellow                                        | 32(6)         | 67(6,8)     | 5(14,7)            | 65(6)              | 29(15,4)     | 8(3,8)             | 25(14,8)              | 54(6,4)             | 24(4,8)            | 64(6,8)      | 34(12,1)   | 15(4,5)     | 0(0)          | 113(7,1)      |
| yes my religious                                          | 67(12,5)      | 134(13,6)   | 2(5,9)             | 161(14,7)          | 19(10,1)     | 19(8,9)            | 22(13)                | 113(13,4)           | 70(14,1)           | 156(16,6)    | 29(10,3)   | 30(9)       | 0(0)          | 215(13,5)     |
| yes my sexual id                                          | 4(0,8)        | 19(1,9)     | 2(5,9)             | 13(1,2)            | 8(4,3)       | 4(1,9)             | 11(6,5)               | 11(1,3)             | 5(1)               | 11(1,2)      | 12(4,3)    | 4(1,2)      | 1(2,3)        | 28(1,8)       |
| yes my sexual or                                          | 3(0,6)        | 11(1,1)     | 2(5,9)             | 3(0,3)             | 8(4,3)       | 4(1,9)             | 7(4,1)                | 4(0,5)              | 4(0,8)             | 8(0,9)       | 6(2,1)     | 2(0,6)      | 0(0)          | 16(1)         |
| yes my disability                                         | 5(0,9)        | 8(0,8)      | 0(0)               | 10(0,9)            | 2(1,1)       | 0(0)               | 1(0,6)                | 11(1,3)             | 2(0,4)             | 9(1)         | 1(0,4)     | 2(0,6)      | 0(0)          | 12(0,8)       |
| nothing suits me                                          | 43(8)         | 60(6,1)     | 5(14,7)            | 67(6,1)            | 15(8)        | 25(11,7)           | 15(8,9)               | 60(7,1)             | 36(7,3)            | 86(9,2)      | 18(6,4)    | 13(3,9)     | 0(0)          | 117(7,3)      |
| don't know                                                | 37(6,9)       | 103(10,5)   | 7(20,6)            | 76(7)              | 14(7,5)      | 48(22,5)           | 34(20,1)              | 73(8,6)             | 33(6,7)            | 71(7,6)      | 57(20,2)   | 24(7,2)     | 5(11,6)       | 157(9,8)      |

**Table6: The right to satisfying and safe sexual life free from stigma and discrimination**

|                                                     | Women<br>n(%) | Men<br>n(%) | non-binary<br>n(%) | Heterosexu<br>n(%) | LGBA<br>n(%) | Don't want<br>n(%) | Still waiting<br>n(%) | 2016 or lat<br>n(%) | before 201<br>n(%) | MENA<br>n(%) | SA<br>n(%) | SSA<br>n(%) | Other<br>n(%) | Total<br>n(%) |
|-----------------------------------------------------|---------------|-------------|--------------------|--------------------|--------------|--------------------|-----------------------|---------------------|--------------------|--------------|------------|-------------|---------------|---------------|
| <b>Satisfaction in sexual life</b>                  |               |             |                    |                    |              |                    |                       |                     |                    |              |            |             |               |               |
| Satisfied                                           | 353(65,3)     | 663(67,5)   | 19(55,9)           | 763(69,4)          | 109(56,5)    | 118(57)            | 107(63,3)             | 586(69,3)           | 313(62,9)          | 627(66)      | 180(64,5)  | 220(66,5)   | 33(75)        | 1060(66,1)    |
| dissatisfied                                        | 29(5,4)       | 140(14,3)   | 10(29,4)           | 124(11,3)          | 41(21,2)     | 14(6,8)            | 38(22,5)              | 82(9,7)             | 58(11,7)           | 101(10,6)    | 63(22,6)   | 25(7,6)     | 1(2,3)        | 190(11,9)     |
| not applicable                                      | 159(29,4)     | 179(18,2)   | 5(14,7)            | 213(19,4)          | 43(22,3)     | 75(36,2)           | 24(14,2)              | 178(21)             | 127(25,5)          | 222(23,4)    | 36(12,9)   | 86(26)      | 10(22,7)      | 354(22,1)     |
| <b>Last sex in a safe place</b>                     |               |             |                    |                    |              |                    |                       |                     |                    |              |            |             |               |               |
| no                                                  | 5(2,6)        | 45(13,6)    | 2(20)              | 43(10,1)           | 8(14,8)      | 3(6,5)             | 8(17)                 | 25(8,9)             | 17(9)              | 29(8,2)      | 9(14,8)    | 17(15,6)    | 0(0)          | 55(10,1)      |
| yes                                                 | 167(85,6)     | 257(77,6)   | 6(60)              | 352(82,6)          | 40(74,1)     | 27(58,7)           | 32(68,1)              | 224(80)             | 157(82,6)          | 286(81)      | 48(78,7)   | 82(75,2)    | 21(95,5)      | 437(80,2)     |
| can't/ don't wan                                    | 23(11,8)      | 29(8,8)     | 2(20)              | 31(7,3)            | 6(11,1)      | 16(34,8)           | 7(14,9)               | 31(11,1)            | 16(8,4)            | 38(10,8)     | 4(6,6)     | 10(9,2)     | 1(4,6)        | 53(9,7)       |
| <b>Last sex could suggest condom/contraceptives</b> |               |             |                    |                    |              |                    |                       |                     |                    |              |            |             |               |               |
| no                                                  | 42(20,6)      | 71(19,8)    | 1(9,1)             | 93(20,8)           | 9(14,3)      | 6(11,5)            | 14(26,4)              | 58(19,3)            | 36(17,7)           | 72(18,7)     | 18(27,3)   | 23(20,4)    | 2(9,1)        | 115(19,6)     |
| yes                                                 | 122(59,8)     | 219(61)     | 7(63,6)            | 280(62,5)          | 39(61,9)     | 26(50)             | 25(47,2)              | 175(58,1)           | 134(65,7)          | 239(61,9)    | 34(51,5)   | 64(56,6)    | 16(72,7)      | 353(60,1)     |
| can't/ don't wan                                    | 40(19,6)      | 69(19,2)    | 3(27,3)            | 75(16,7)           | 15(23,8)     | 20(38,5)           | 14(26,4)              | 68(22,6)            | 34(16,7)           | 75(19,4)     | 14(21,2)   | 26(23)      | 4(18,2)       | 119(20,3)     |
| <b>Used the following to avoid pregnancy</b>        |               |             |                    |                    |              |                    |                       |                     |                    |              |            |             |               |               |
| hormonal methc                                      | 45(22,8)      | 53(14,3)    | 1(7,1)             | 82(18,6)           | 11(13,3)     | 4(8,2)             | 10(16,7)              | 47(15,5)            | 40(19,9)           | 58(16,3)     | 8(9,4)     | 26(18,4)    | 9(50)         | 101(16,8)     |
| condom                                              | 50(25,4)      | 193(52)     | 6(42,9)            | 193(43,9)          | 38(45,8)     | 15(30,6)           | 28(46,7)              | 129(42,4)           | 81(40,3)           | 141(39,5)    | 46(54,1)   | 58(41,1)    | 10(55,6)      | 255(42,4)     |
| intrauterine dev                                    | 39(19,8)      | 20(5,4)     | 2(14,3)            | 45(10,2)           | 7(8,4)       | 7(14,3)            | 0(0)                  | 40(13,2)            | 21(10,5)           | 54(15,1)     | 4(4,7)     | 4(2,8)      | 1(5,6)        | 63(10,5)      |
| natural family pl                                   | 47(23,9)      | 49(13,2)    | 1(7,1)             | 83(18,9)           | 8(9,6)       | 3(6,1)             | 1(1,7)                | 51(16,8)            | 40(19,9)           | 83(23,3)     | 3(3,5)     | 10(7,1)     | 2(11,1)       | 98(16,3)      |
| emergency cont                                      | 7(3,5)        | 17(4,5)     | 0(0)               | 22(4,9)            | 1(1,2)       | 1(2)               | 3(4,9)                | 11(3,6)             | 7(3,4)             | 8(2,2)       | 3(3,5)     | 12(8,2)     | 0(0)          | 23(3,8)       |
| no but was nec                                      | 7(3,6)        | 19(5,1)     | 0(0)               | 19(4,3)            | 3(3,6)       | 2(4,1)             | 6(10)                 | 8(2,6)              | 8(4)               | 11(3,1)      | 5(5,9)     | 10(7,1)     | 0(0)          | 26(4,3)       |
| no I was plannin                                    | 43(18,1)      | 40(9,8)     | 1(6,7)             | 67(13,4)           | 4(4,7)       | 6(10,9)            | 4(6,3)                | 45(13)              | 33(14,3)           | 50(12,4)     | 6(6,6)     | 21(13)      | 3(14,3)       | 80(11,8)      |
| no I don't know                                     | 4(2)          | 4(1,1)      | 0(0)               | 7(1,6)             | 1(1,2)       | 0(0)               | 0(0)                  | 5(1,6)              | 3(1,5)             | 7(2)         | 0(0)       | 1(0,7)      | 0(0)          | 8(1,3)        |
| no we had sex w                                     | 14(7,1)       | 36(9,7)     | 4(28,6)            | 41(9,3)            | 9(10,8)      | 5(10,2)            | 6(10)                 | 33(10,9)            | 18(9)              | 38(10,6)     | 9(10,6)    | 10(7,1)     | 0(0)          | 57(9,5)       |
| unsure/don't kn                                     | 13(6,6)       | 49(13,2)    | 1(7,1)             | 31(7,1)            | 16(19,3)     | 13(26,5)           | 13(21,7)              | 26(8,6)             | 18(9)              | 20(5,6)      | 17(20)     | 25(17,7)    | 2(11,1)       | 64(10,7)      |
| other                                               | 6(3,1)        | 11(3)       | 2(14,3)            | 11(2,5)            | 7(8,4)       | 2(4,1)             | 3(5)                  | 8(2,6)              | 9(4,5)             | 10(2,8)      | 3(3,5)     | 8(5,7)      | 0(0)          | 21(3,5)       |
| <b>Used protection against STDs</b>                 |               |             |                    |                    |              |                    |                       |                     |                    |              |            |             |               |               |
| condom                                              | 38(16,5)      | 193(47,5)   | 8(44,4)            | 175(35,1)          | 36(41,9)     | 23(40,4)           | 32(49,2)              | 124(36,3)           | 69(29,7)           | 120(30,4)    | 49(53,9)   | 59(36,2)    | 11(52,4)      | 239(35,7)     |
| no not importan                                     | 89(38,5)      | 62(15,3)    | 4(22,2)            | 127(25,5)          | 13(15,1)     | 11(19,3)           | 6(9,2)                | 86(25,2)            | 59(25,4)           | 116(29,4)    | 8(8,8)     | 36(22,1)    | 2(9,5)        | 162(24,2)     |
| no but was nec                                      | 10(4,3)       | 42(10,3)    | 2(11,1)            | 40(8)              | 10(11,6)     | 5(8,8)             | 8(12,3)               | 26(7,6)             | 16(6,9)            | 27(6,8)      | 6(6,6)     | 19(11,7)    | 0(0)          | 52(7,8)       |
| no I was plannin                                    | 37(16)        | 27(6,7)     | 1(5,6)             | 50(10)             | 4(4,7)       | 7(12,3)            | 3(4,6)                | 34(9,9)             | 28(12,1)           | 43(10,9)     | 3(3,3)     | 14(8,6)     | 6(28,6)       | 66(9,9)       |
| no I don't know                                     | 5(2,2)        | 10(2,5)     | 0(0)               | 13(2,6)            | 2(2,3)       | 0(0)               | 1(1,5)                | 8(2,3)              | 7(3)               | 10(2,5)      | 2(2,2)     | 4(2,5)      | 0(0)          | 16(2,4)       |
| no we had sex w                                     | 40(17,3)      | 36(8,9)     | 1(5,6)             | 65(13)             | 6(7)         | 5(8,8)             | 3(4,6)                | 48(14)              | 31(13,4)           | 66(16,7)     | 2(2,2)     | 14(8,6)     | 0(0)          | 82(12,2)      |
| unsure/don't kn                                     | 17(7,4)       | 48(11,8)    | 1(5,6)             | 44(8,8)            | 15(17,4)     | 6(10,5)            | 14(21,5)              | 26(7,6)             | 25(10,8)           | 23(5,8)      | 23(25,3)   | 21(12,9)    | 1(4,8)        | 68(10,2)      |
| other                                               | 7(3)          | 7(1,7)      | 2(11,1)            | 8(1,6)             | 5(5,8)       | 3(5,3)             | 3(4,6)                | 7(2,1)              | 5(2,2)             | 8(2)         | 3(3,3)     | 4(2,5)      | 1(4,8)        | 16(2,4)       |
| <b>Discrimination in the last 12 months</b>         |               |             |                    |                    |              |                    |                       |                     |                    |              |            |             |               |               |
| No                                                  | 401(73,2)     | 603(59,8)   | 24(70,6)           | 684(62,7)          | 110(56,4)    | 158(74,2)          | 71(40,1)              | 594(68,5)           | 333(66,3)          | 591(62,0)    | 146(50,2)  | 264(76,3)   | 37(84,1)      | 1038(63,5)    |
| Yes, once                                           | 57(10,4)      | 156(15,5)   | 1(2,9)             | 155(14,2)          | 32(16,4)     | 20(9,4)            | 37(20,9)              | 114(13,2)           | 60(12,0)           | 135(14,2)    | 53(18,2)   | 41(11,9)    | 4(9,1)        | 233(14,3)     |
| yes, several time                                   | 90(16,4)      | 250(24,8)   | 9(26,5)            | 252(23,1)          | 53(27,2)     | 35(16,4)           | 69(39,0)              | 159(18,3)           | 109(21,7)          | 228(23,9)    | 92(31,6)   | 41(11,9)    | 3(6,8)        | 364(22,3)     |
| <b>Discrimination based on</b>                      |               |             |                    |                    |              |                    |                       |                     |                    |              |            |             |               |               |
| sexual orientatic                                   | 2(1,3)        | 19(4,6)     | 5(50,0)            | 7(1,7)             | 14(16,3)     | 5(8,6)             | 9(8,3)                | 11(4,0)             | 3(1,8)             | 11(3,0)      | 11(7,5)    | 6(7,9)      | 0(0,00)       | 28(4,7)       |
| sexual identity                                     | 6(4,0)        | 14(3,1)     | 4(40,0)            | 13(3,2)            | 5(5,8)       | 4(6,9)             | 8(7,3)                | 10(3,6)             | 7(4,1)             | 14(3,8)      | 8(5,5)     | 2(2,6)      | 1(12,5)       | 25(4,2)       |
